# Supplementary material for: Effective editing for lysophosphatidic acid acyltransferase 2/5 in allotetraploid rapeseed (Brassica napus L.) using CRISPR-Cas9 system
Source: PubMed Central journal article supplement (PMC6753616; doi:10.1186/s13068-019-1567-8), 2019-09-20
Supplement: 13068_2019_1567_MOESM1_ESM.pdf [file 13068_2019_1567_MOESM1_ESM.pdf]

BnLPAT2-C4 : ATGGCGATGGCTGCAGCTG---TAATCGTGCCTTTAGGCCTTCTCTTCTTCATCTTTGGTCTCTCGTGAACCTCCTCCTAGCAATTTGCTA---T----- : 90  
BnLPAT2-A4 : ATGGCGATAACTGCAGCTG---TAATAGTGCCTTTAGGCCTTCTCTTCTTCATCTCTGGTCTCTCATGAACCTCCTCAGGCAATTTGTATGTACTCGTTAGACCTCTGTCTAAGAACACATACAGAA : 127  
BnLPAT2-A7 : ATGGCGATGGCAGCAGCAG---TGATTGTGCCTTTGGGGATTCTCTTCTTCATTTCTGGCCTCGTTGTCAATCTCCTCAGGCAGTTTGTCTATGTCCTCGTTTCGACCTCTGTCTAAGAACACATACAGAA : 127  
BnLPAT2-C7 : ATGGCGATGGCAGCAGCAGCAGTGATTGTGCCTTTGGGGATTCTCTTCTTCATTTCTGGCCTCGTTGTCAATCTCCTCAGGCAGTTTGTCTATGTCCTCATTTCGACCTCTGTCTAAGAACACATACAGAA : 130  
BnLPAT2-A9 : ATGGCGATGGCAGCAGCTG---TGATTGTGCCTCTGGGAATTCTCTTCTTCATATCTGGTCTCGTTGTCAATCTCCTCAGGCAGTTTGTCTATGTTCTTATTTCGACCTCTGTCTAAGAACACGTACAGAA : 127  
BnLPAT2-C8 : ATGGCGATGGCAGCAGCTG---TGATTGTGCCTCTGGGCATTCTCTTCTTCATATCTGGTCTCGTTGTCAATCTCCTCAGGCAGTTTGTCTATGTTCTTATTTCGACCTCTGTCTAAGAACACGTACAGAA : 127  
BnLPAT2-A07 : ----- : -  
atggcgat c gcagc g t at gtgcct t gg ttctcttcttcat t tgg ctc t t aa ctct c gc tttg ta t

BnLPAT2-C4 : -----C-----TTGTCTGGATCGTTGACTGGTGGGCAGGAGTCAAGATCAAAGTCTTTACTGATAATGAGACGTTTAATCGAATGGGCAAAGAACACGCTCT : 182  
BnLPAT2-A4 : AAATCAACCGGGTGGTTCGAGAAACTTTGTGGCTTGAGCTTGTCTGGATCGTTGACTGGTGGGCAGGAGTCAAGATCAAAGTGTCTGCTGATAATGAGACCTTCAGTCGAATGGGAAAAGAACATGCTCT : 257  
BnLPAT2-A7 : AGATCAACCGGGTGGTTCGAGAAACCTTGTGGTTGAGCTTGTCTGGATCGTTGACTGGTGGGCAGGAGTCAAGATCAAAGTCTTTGCTGATGATGAGACCTTTAATCGAATGGGCAAAGAACATGCTCT : 257  
BnLPAT2-C7 : AGATCAACCGTGTGGTTCGAGAAACCTTGTGGTTGAGCTTGTCTGGATCGTTGACTGGTGGGCAGGAGTCAAGATCAAAGTGTCTGCTGATGATGAGACCTTTAATCGAATGGGCAAAGAGCATGCTCT : 260  
BnLPAT2-A9 : AAATCAACCGGGTGGTTCGAGAAACCTTGTGGCTTGAGCTTGTCTGGATTGTTGACTGGTGGGCAGGAGTCAAGATCAAAGTGTCTGCTGATAATGAGACCTTCAATCGAATGGGCAAAGAACATGCTCT : 257  
BnLPAT2-C8 : AAATCAACCGGGTGGTTCGAGAAACCTTGTGGCTTGAGCTTGTCTGGATTGTTGACTGGTGGGCAGGAGTCAAGATCAAAGTGTCTGCTGATAATGAGACCTTCAATCGAATGGGCAAAGAACATGCTCT : 257  
BnLPAT2-A07 : ----- : -  
c ttgtctggat gttgactggtgggc gg gt a gatc aagt ttt ctgat atgagac tt a tcgaatggg aaaga ca gctct

BnLPAT2-C4 : TGTCGTTTGTAAATCACCGAAGTGATATTGATTGGCTTGTGGGATGGATTCTCGCTCAGAGGTCAGGTTGCCTGGGAAGCGCATTAGCTGTAAACGAAGAAGTCTTCCAAATTTCTCCAGTCAAAGGCTGG : 312  
BnLPAT2-A4 : TGTCGTTTGTAAATCACCGAAGTGATATCGATTGGCTTGTGGGATGGATTCTGGCTCAGAGGTCAGGTTGCCTGGGAAGTGCCTTAGCTGTAAACGAAGAATTCTAACAAGTTTCTTCCAGTCATAGGCTGG : 387  
BnLPAT2-A7 : TGTCGTTTGTAAATCACCGAAGTGATATTGATTGGCTCGTGGGATGGATTCTCGCTCAGAGGTCAGGTTGCCTAGGAAGCGCATTAGCTGTGATGAAGAAGTCTTCCAAATTTCTCCAGTCATAGGCTGG : 387  
BnLPAT2-C7 : TGTCGTTTGTAAATCACCGAAGTGATATTGATTGGCTCGTGGGATGGATTCTGGCTCAGAGGTCAGGTTGCCTAGGAAGCGCATTAGCTGTGATGAAGAAGTCTTCCAAATTTCTTCCAGTCATAGGCTGG : 390  
BnLPAT2-A9 : TGTCGTTTGTAAATCACCGAAGTGATATTGATTGGCTTGTGGGATGGATTCTGGCTCAGAGATCAGGTTGCCTGGGAAGCGCATTGGCTGTAATGAAGAAGTCTTCTAAATTTCTTCCAGTCATAGGCTGG : 387  
BnLPAT2-C8 : TGTCGTTTGTAAATCACCGAAGTGATATTGATTGGCTTGTGGGATGGATTCTGGCTCAGAGATCAGGTTGCCTGGGAAGCGCATTGGCTGTAATGAAGAAGTCTTCTAAATTTCTTCCAGTCATAGGCTGG : 387  
BnLPAT2-A07 : ----- : -  
tgctcgtttgtaatcacccaagtgatattgattggct gtgggatggattct gctcagag tcaggttgcct ggaag gc tt gctgt a gaagaa tct aa tttct ccagtca aggctgg

BnLPAT2-C4 : TCAATGTGGTTCTCAGAGTATCTATTTCTGGAAAGAAAATGGGTAAGGATGAAAGCACAAATAAAGTCAGGTCTTCAACGCTTGAAAGACTTCCCACAGCCCTTCTGGCTAGCCCTTTTGTGGAGGGAA : 442  
BnLPAT2-A4 : TCAATGTGGTTCTCAGAGTTCTGTTTTTGGAAAGAAAATGGGCAAAGGATGAAAGCACAAATAAAGTCAGGTCTTCAACGCTTGAAAGACTTCCCACAGCCCTTCTGGCTAGCCCTTTTGTGGAGGGAA : 517  
BnLPAT2-A7 : TCAATGTGGTTCTCCAGATATCTGTTTTCTGAAAGAAAATGGGCAAAGGATGAAAGCACTTTAAAGTCAGGTCTTCAACGCTTGAAAGACTTCCCACGGCCCTTCTGGCTAGCTCTTTTGTGGAGGGAA : 517  
BnLPAT2-C7 : TCAATGTGGTTCTCGGAGTATCTGTTTTCTGAAAGAAAATGGGCAAAGGATGAAAGCACTTTAAAGTCAGGTCTTCAACGCTTGAAAGACTTCCCACGGCCCTTCTGGTTAGCCCTTTTGTGGAGGGAA : 520  
BnLPAT2-A9 : TCAATGTGGTTCTCGGAGTATCTGTTTTCTGAAAGAAAATGGGCAAAGGATGAAAGCACTTTAAAGTCAGGTCTTCAACGCTTGAAAGACTTCCCACAGCCCTTCTGGTTAGCACTTTTGTGGAGGGAA : 517  
BnLPAT2-C8 : TCAATGTGGTTCTCGGAGTATCTGTTTTCTGAAAGAAAATGGGCAAAGGATGAAAGCACTTTAAAGTCAGGTCTTCAACGCTTGAAAGACTTCCCACAGCCCTTCTGGTTAGCACTTTTGTGGAGGGAA : 517  
BnLPAT2-A07 : -----ATGTGTGTTTATCCAAATCA----ACAGTCAGGTCTTCAACGCTTGAACTACTTCCCACGTCCTTTCTGGTTAGCCCTTTTGTGGAGGGAA : 88  
tcaatgtggttctc gagt tct ttt t gaaagaaa TGgG aaaggatgAAAgCac tAaAGTCAGGTCTTCAACGCTTGAA gACTTCCC CctTtTCTGG TAGC CTTTTTGTgGAGGGaA

BnLPAT2-C4 : CTCGCTTTACAGAGACGAAACTTAAAGCAGCACAAGAGTACGCAGCTTCCTCTGAGTTGCCTATCCCTCGAAATGTCTTGATTCCCTCGTACC AAAGGTTTGTGTCAACAGTTATTAATATGCGTTCATT : 572  
BnLPAT2-A4 : CCCGCTTTACAGAGACAAA ACTTAAAGCAGCACAAGAAATACGCAGCGTCCCTCTGAGTTGCCTATCCCTCGTAATGTCTTGATTCCCTCGTACC AAAGGTTTGTGTCAACGTTAAGTAATATGCGTTCATT : 647  
BnLPAT2-A7 : CCCGCTTTACAGAGAGCAA ACTTAAAGCAGCACAAGAGTACGCAGCTTCCTCTGAGTTGCCTGTCCCTCGAAATGTCTTGATTCCCTCGCACC AAAGGATTTGTGTCAACGTTAAGTAATATGCGTTCATT : 647  
BnLPAT2-C7 : CCCGTTTACAGAGAGCAA ACTTAAAGCAGCACAAGAGTACGCAGCTTCCTCTGAGTTGCCTGTCCCTCGAAATGTCTTGATTCCCTCGCACC AAAGGTTTGTGTCAACGTTAAGTAATATGCGTTCATT : 650  
BnLPAT2-A9 : CCCGCTTTACAGAGGCTAA ACTTAAAGCAGCACAAGAGTACGCTGCC TCCTCTGAGCTGCCTGTCCCTCGAAATGTCTTGATTCCCTCGCACC AAAGGTTTGTGTCAACGTTAAGTAATATGCGTTCATT : 647  
BnLPAT2-C8 : CCCGCTTTACAGAGGCTAA ACTTAAAGCAGCACAAGAGTACGCTGCC TCCTCTGAGCTGCCTGTCCCTCGAAATGTCTTGATTCCCTCGCACC AAAGGTTTGTGTCAACGTTAAGTAATATGCGTTCATT : 647  
BnLPAT2-A07 : CCCTCTTTACTGAGGCAA ACTTAAAG---T-----GTACGCAGCTCCTCTGAGTTGCCTATCCCTCGAAATGTCTTGATTCCCTCGCGCCAAAG--TAAGTTTCAATAAGTT--T-----TCTTCTTT : 200  
CcCgcTT AcaGAG C AA ACTTAAAGcagcacaagagTACGC GC TCCTCTgAG TGCCT TCCCTCGaAATGT TTGATTCCCTCG aCCAAAGg TttGTgTCA c GTta Taa atgCgTTCaTT

BnLPAT2-C4 : TGTCCAGTCATTTATGATATGACCGTGGCTATTCCAAAATCTTCTCCTCCCCCAACAATGCTAAGACTATTCAAAGGACAACCTTCATT-----ATCCATTTCTTTTACATTAGAAATTTT : 689  
BnLPAT2-A4 : TGTCCAGCCATTTATGATATGACCGTGGCTATTCCAAA ACTTCTCCACCCCAACAATGCTAAGACTATTCAAAGGACAACCTTCTGTGGTGCATGTTACATAAAGTGTCACTCGATGAAAGACTTG : 777  
BnLPAT2-A7 : TGTGCCAGCCATATATGATATGACCGTGGCTATTCCAAA ACTTCTCCACCCCAACGATGCTAAGACTATTCAAAGGACAACCTTCTGTGGTGCATGTTACATCAAGTGTCACTCGATGAAAGACTTG : 777  
BnLPAT2-C7 : TGTGCCAGCCATATATGATATGACCGTGGCTATTCCAAA ACTTCTCCACCCCAACGATGCTAAGACTATTCAAAGGACAACCTTCTGTGGTGCATGTTACATCAAGTGTCACTCGATGAAAGACTTG : 780

BnLPAT2-A9 : TGTCCAGCCATTATGATATGACCGTGGCTATTCACAAAACATCTCCACCCCAACGATGCTCAGACTATTCAAAGGACAACCTTCTGTGGTGCATGTTACATCAAGTGTCACTCGATGAAAGACTTG : 777  
BnLPAT2-C8 : TGTCCAGCCATTATGATATGACCGTGGCTATTCACAAAACATCTCCACCCCAACGATGCTCAGACTATTCAAAGGACAACCTTCTGTGGTGCATGTTACATCAAGTGTCACTCGACGAAAGACTTG : 777  
BnLPAT2-A07 : TG-CACATTCTTGGGCAACTTGCCTCTCTCACTG----- : 234  
Tgt cCAg CaT tatgAtaTgaCcgTggctAtTcAAAA c tctcc ccccaac atgct agactattca aggaca ccttc t at a t t c t a a a t t

BnLPAT2-C4 : C---ATTCTG--GA-----CACACTCAT-CTCATCTCGGCTCTGTGGTACAGGATGCACCTGTTAGACAAACACATAGCGGCAGATACTTTCTCCCATCAGCAAGAACAGAACATTGGCCGTCCCATG : 805  
BnLPAT2-A4 : CCTGAATCAGATGAGGCAATTGCACAGTGGTGCATAAATCAGTT-TGTGGCTAAGGATGCACCTGTTAGACAAACACATAGCGGCAGACACTTTCCCTGGTCAGCAGGAGCAGAACATTGGCCGTCCCATG : 906  
BnLPAT2-A7 : CCTGAATCAGAAAGACGAAATTGCACAGTGGTGCAGAGATCAGTT-TGTGACTAAGGATGCACCTGTTAGACAAACACATAGCTGCAGACACTTTCCCGGTCAGAAAGAACAGAACATTGGCCGTCCCATG : 906  
BnLPAT2-C7 : CCTGAATCAGAAAGACGAAATTGCACAGTGGTGCAGAGATCAGTT-TGTGGCTAAGGATGCACCTGTTAGACAAACACATAGCTGCAGACACTTTCCCGGTCAGAAAGAACAGAACATTGGCCGTCCCATG : 909  
BnLPAT2-A9 : CCTGAATCAGATGACGCAATTGCACAGTGGTGCAGAGATCAGTT-TGTGGCTAAGGATGCACCTATTAGACAAACACATAGCTGCAGACACTTTCCCTGGTCAGCAAGAACAGAACATTGGCCGTCCCATG : 906  
BnLPAT2-C8 : CCTGAATCAGATGACGCAATTGCACAGTGGTGCAGAGATCAGTT-TGTGGCTAAGGATGCACCTATTAGACAAACACATAGCTGCAGACACTTTCCCTGGTCAGCAAGAACAGAACATTGGCCGTCCCATG : 906  
BnLPAT2-A07 : ----- : -  
c a t c g g a c a c a t t c a t c g t t g t g a g g a t g c a c t t t a g a c a a a c a c a t a g c g c a g a a c t t t c c t c a g a g a c a g a a c a t t g g c c g t c c c a t

BnLPAT2-C4 : TAGTCTCTTGCAGTGGTTCTATCATGGGCCTGCATACTAACTCTCGGAGCAATGAAATTCTTGCACTGGTCAAATCTCTTTTCTCATGGAAAGGCATGGCGTTATCAGCGCTTGGTCTAGGAAAGATTAC : 935  
BnLPAT2-A4 : AAGTCTCTTGCAGTGGTTTATCATGGGCCTGCCTACTAACTCTAGGAGCAATTAATTCTTACTGTTGATCTCTTTTCTCATGGAAAGGCATGGCGTTGTCGGCACTTGGTCTAGGTGTCAT-C : 1035  
BnLPAT2-A7 : AAGTCTCTTGCAGTGGTTCTGTCATGGGCATGCTACTAACTCTTGGAGCAATGAAGTTCTTACTGTTCAAATCTCTTTTCTCATGGAAAGGCATCGCATTATCAGCGCTTGGTCTAGGCATCAT-C : 1035  
BnLPAT2-C7 : AAGTCTCTTGCAGTGGTTGTCATGGGCATGCCTACTAACTCTTGGAGCAATGAAGTTCTTACTGTTCAAATCTCTTTTCTCATGGAAAGGCATCGCATTATCAGCGCTTGGTCTAGGCATCAT-C : 1038  
BnLPAT2-A9 : AAGTCTCTTGCAGTGGTTCTATCATGGTCATGCCTACTGATTCTTGGAGCAATGAAGTTCTTACTGTTCAAATCTCTTCTCTCATGGAAAGGCATCGCGTTTTCGGCGCTGGGTCTAGGCATCAT-C : 1035  
BnLPAT2-C8 : AAGTCTCTTGCAGTGGTTCTATCATGGTCATGCCTACTGATTCTTGGAGCAATGAAGTTCTTACTGTTCAAATCTCTTCTCTCATGGAAAGGCATCGCGTTTTCGGCGCTGGGTCTAGGCATCAT-C : 1035  
BnLPAT2-A07 : ----- : -  
a g t c t c t t g c a g t g g t t t t c a t g g c t g t a c t a t c t g g a g c a a t t c t t c a c t g g t c a a t c t c t t t c t c t a a a g g c a t g c t t t c g c c t g g t c t a g g t c

BnLPAT2-C4 : GGTTAGCAGATATTATAAAGTG-TGCGAAAGTGTCTGTAATACCATTCGCAGTTTCATATGGGTGAAGTTTGTAGTGTTCACAAGCTTAAATAAATCTCTATAAGCCAGAGGATTATCCTAAGCACACTGA : 1064  
BnLPAT2-A4 : ACTCTCTGTATGCAGATCTTGATCCGTTCCTCTCAGTCAGAGCGTTGG-----ACCC-----CAGCCAAGACAAAATGACCATC---ACCACGCAG---GATCATCTCT---CCCAA : 1132  
BnLPAT2-A7 : ACTCTCTGTATGCAGATCTTGATCCGTTCCTCTCAGTCAGAGCGTTCA-----ACACCTGCCAAAGTCGC---TCCAGCCAAGCCAAAGGACAATC---ACCAGTCAG---GATCATCTCT---CCCAA : 1147  
BnLPAT2-C7 : ACTCTCTGTATGCAGATCTTGATCCGTTCCTCTCAGTCAGAGCGTTCA-----ACACCTGCCAAAGTGGC---CCCAGCCAAGCCAAAGGACAAC---ACCAGTCAG---GATCATCTCT---CCCAA : 1150  
BnLPAT2-A9 : ACTCTCTGTATGCAGATCTTGATCCGTTCCTCTCAGTCAGAGCGTTCT-----ACCCAGCCAAAGTCGT---TCCAGCCAAGCCAAAGGACAATCATAACGACTCAG---GATCATCTCT---CCCAA : 1150  
BnLPAT2-C8 : ACTCTCTGTATGCAGATCTTGATCCGTTCCTCTCAGTCAGAGCGTTCT-----ACCCAGCCAAAGTCGT---TCCAGCCAAGCCAAAGGACAATCATAACGACTCAG---GATCATCTCT---CCCAA : 1150  
BnLPAT2-A07 : ----- : -  
t c g a a g t c g t t c g t a c t t a c a a g a a a c a a c a g g a a t c t c c a

BnLPAT2-C4 : TATAACTGAAGCACACTTGAAGAGACAATGACGGTTATGTTTTTGAGGAAGTTGGAAGATGCTGAGCATGCTATATTTATTTTTGCAGCTTATGCAAGTCATATTACTGATAAGTTTGAAGGAGATTAC : 1194  
BnLPAT2-A4 : CAGATGTGGAG---AAGGACAAG----- : 1152  
BnLPAT2-A7 : CAGAAGTGGAGGAGAAGCAGAAGTAA----- : 1173  
BnLPAT2-C7 : CAGAAGTGGAGGAGAAGCAGAAGTAA----- : 1176  
BnLPAT2-A9 : CAGAAGTGGAG---AAGCAGAAGTAA----- : 1173  
BnLPAT2-C8 : CAGAAGTAGAG---AAGCAGAAGTAA----- : 1173  
BnLPAT2-A07 : ----- : -  
a a t a g a a a g

BnLPAT2-C4 : GGTAGCAGATATTATAAAGATTATGGAAGTGTCCGTAGCAGTTCAATGAGCCGAGGCCAAGGGTACGGAGGCGGGGTGATCTTGTATGCAGATGCACAGAAACGTA AAAAAGCAAGCAACAGATGAGCAGG : 1324  
BnLPAT2-A4 : ----- : -  
BnLPAT2-A7 : ----- : -  
BnLPAT2-C7 : ----- : -  
BnLPAT2-A9 : ----- : -  
BnLPAT2-C8 : ----- : -  
BnLPAT2-A07 : ----- : -

1440 \* 1460 \* 1480 \* 1500 \* 1520 \* 1540 \* 1560

BnLPAT2-C4 : GTTATGAAGAAAGTTGTGACGATGAGAAGAACGAACCATCGTTCACTGGTGGAGTAGATGACCTTGTGATGGATAATGAGGATGAGAACACAGAAGTGGCTTATTGTGGTGATCCTCAAGTGATATGGGA : 1454  
BnLPAT2-A4 : ----- : -  
BnLPAT2-A7 : ----- : -  
BnLPAT2-C7 : ----- : -  
BnLPAT2-A9 : ----- : -  
BnLPAT2-C8 : ----- : -  
BnLPAT2-A07 : ----- : -

\* 1580 \*  
BnLPAT2-C4 : AGAGTTGCACAATCAACTTCTCAATTCCGCAGAA : 1488  
BnLPAT2-A4 : ----- : -  
BnLPAT2-A7 : ----- : -  
BnLPAT2-C7 : ----- : -  
BnLPAT2-A9 : ----- : -  
BnLPAT2-C8 : ----- : -  
BnLPAT2-A07 : ----- : -
