# Supplementary material for: Effective editing for lysophosphatidic acid acyltransferase 2/5 in allotetraploid rapeseed (Brassica napus L.) using CRISPR-Cas9 system
Source: PubMed Central journal article supplement (PMC6753616; doi:10.1186/s13068-019-1567-8), 2019-09-20
Supplement: 13068_2019_1567_MOESM2_ESM.pdf [file 13068_2019_1567_MOESM2_ESM.pdf]

BnLPAT5-A5 : ATGATGTTGATTTTCTGGGGGTTCCCTATCAGCTGTAGTGATGAGGCTTTTCAGCTTACACTACAGCCGTAATGTGTTTATTTCTTCTTTGGCTCTGGCTCGCCTTGTGGCCTTTCTCTTTGAGAAGA : 130  
BnLPAT5-C5 : ATGATGTTGATTTTCTGGGGGTTCCCTATCAGCTGTAGTGATGAGGCTTTTCAGCTTACACTACAGCCGTAATGTGTTTATTTCTTCTTTGGCTCTGGCTCGCCTTGTGGCCTTTCTCTTTGAGAAGA : 130  
BnLPAT5-C1 : ATGATGTTGATATTCTGGGGGTTCCCTATCAGCTGTAGTGTTGAGACTCTTCAGCATACTATAGCCGTAATGTGTTTCTTTCTTCTTCGGCTCTGGCTCGCCTTGTGGCCTTTCTCTTTGAGAAGA : 130  
BnLPAT5-UK : ATGATGTTGATATTCTGGGGGTTCCCTATCAGCTGTAGTGTTGAGACTCTTCAGCATACTATAGCCGTAATGTGTTTCTTTCTTCTTCGGCTCTGGCTCGCCTTGTGGCCTTTCTCTTTGAGAAGA : 130

ATGATGTTGAT TTCTGGGGGTTCCCTATCAG tGTAGTG TGAG CT TTCAGC TACACTA AGCCGTAATGTGTTT TTTCTTCTT GGCTCCTGGCTCGCCTTGTGGCCTTTCTCTTTGAGAAGA

BnLPAT5-A5 : TCAATAGAACCAAAGTTATCTTCTCAGGGGATAAGGTTCCCTGTGAGTCACGAGTGTGCTCATTGCCAATCACCGAACAGAGGTTGACTGGATGTACTTCTGGGATCTTGCACTGCGTAAAGGTCAGAT : 260  
BnLPAT5-C5 : TCAACAGAACCAAAGTTATCTTCTCTGGGGATAAGGTTCCCTGTGAGTCACGAGTGTGCTCATTGCCAATCACCGAACAGAGGTTGACTGGATGTACTTCTGGGATCTTGCACTGCGTAAAGGTCAGAT : 260  
BnLPAT5-C1 : TAAACGGAACCAAAGTTGTCTTCTCTGGGGATAAAGTTCCTTGCGAGGAACGAGTATTGCTCATTGCGAATCACCGAACAGAGTTGATTGGATGTACTTCTGGGATCTTGCACTGCGCAAAGGCCAGAT : 260  
BnLPAT5-UK : TAAACGGAACCAAAGTTGTCTTCTCTGGGGATAAAGTTCCTTGCGAGGAACGAGTATTGCTCATTGCGAATCACCGAACAGAGTTGATTGGATGTACTTCTGGGATCTTGCACTGCGCAAAGGCCAGAT : 260

T AAc GAACCAAAGTT TCTTCTCtGGGGATAA GTTCCTTG GAG ACGAGT TTGCTCATTGC AATCACCGAACAGA GTTGA TGGATGTACTTCTGGGATCTTGCACTGCG AAAGG CAGAT

BnLPAT5-A5 : TGGGAATATGAAGTATGTCCTTAAGAGCAGTCTGATGAA GTTGCCCTCTGTTCCGGTTGGGCGTTTCACCTCTTTGAGTTTATCCCCGTTGAGCGGAAATGGAAAGTAGATGAAGCAAACCTGAGGCAGATG : 390  
BnLPAT5-C5 : TGGGAATATGAAGTATGTCCTTAAGAGCAGTCTGATGAA GTTGCCCTCTGTTCCGGTTGGGCGTTTCACCTCTTTGAGTTTATCCCCGTTGAGCGGAAATGGAAAGTAGATGAAGCAAACCTGAGGCAGATG : 390  
BnLPAT5-C1 : TGGGAACATGAAGTATGTGCTTAAGAGCAGCTTGATGAA ACTACCTCTGTTTGGTTGGGCGTTTCACCTCTTTGAGTTTATTCCCCGTTGAGCGGAGATGGGAAGTGGATGAAGCGAACTGAGGCAGATA : 390  
BnLPAT5-UK : TGGGAACATGAAGTATGTGCTTAAGAGCAGCTTGATGAA GTTACCTCTGTTTGGTTGGGCGTTTCACCTCTTTGAGTTTATCCCCGTTGAGAGGAAATGGGAAGTCGATGAAGCGAACTGAGGCAGATA : 390

TGGGAA ATGAAGTATGT CTTAAGAGCAG TGATGAAgtT CCTCTGTT GGTGGGCGTTTCACCTCTTTGAGTTTATcCCCgTTGAGcGGAAATGG AAGT GATGAAGC AACTTGAGGCAGAT

BnLPAT5-A5 : GTTTCAGTTTTAAGGATCCTCGAGATGGTTTATGGCTTGGTCTTTTCCCAGAGGCACAGATTACAC-----GCGAAAGGAGCAAGAAGTTTGCAGCTTGAGAAATGGCCTTCCAGAACTGAACA : 509  
BnLPAT5-C5 : GTTTCAGTTTTAAGGATCCTCGAGATGGTTTATGGCTTGGTCTTTTCCCAGAGGCACAGATTACACAGAGGCGAAACGCGAAAGGAGCAAGAAGTTTGCAGCTTGAAAATGGTTTACCATACTGAACA : 520  
BnLPAT5-C1 : GTTTCAGTTTTAAGGATCCTAGAGACGCTTTATGGCTTGGTCTTTTCCCTGAAGGCACAGATTACAC-----GCGAAAGGAGCAAGAAGTTTGCAGCCGAACATGGCTTACCAGTACTGAGCA : 509  
BnLPAT5-UK : GTTTCAGTTTTAAGGATCCTAGAGATGCTTTATGGCTTGGTCTTTTCCCAGAGGCACAGATTACAC-----GCGAAAGGAGCAAGAAGTTTGCAGCTTGAAACATGGCTTACCAGTACTGAACA : 509

GTTTC AGTTTTAAGGATCCT GAGAtG TTTATGGCTTG TCTTTTTcCCcGA GGCACAGATTACAC GCGAAAGGAGCAAGAAGTTTGCAGCTGaa ATGGctTaCCagtACTGAaCA

BnLPAT5-A5 : ATGTCTTGCTTCCCAAGACAAAAGGTTTGTCTCCTGCTTGGAAAGAA TGGATTCTCCTACTTGATGCAGTTTATGATGTGACCATCGGTTACAAAACCCGTTGTCCGTCTTTCTTAGACAATGTCTATGG : 638  
BnLPAT5-C5 : ACGTCTTGCTTCCCAAGACAAAAGGTTTGTCTCCTGCTTGGAAAGAACTGGGTTGCTCCTACTTGATGCAGTTTATGATGTGACCATCGGTTACAAAACCCGTTGTCCGTCTTTCTTAGACAATGTCTATGG : 650  
BnLPAT5-C1 : ACGTCTGCTTCCCAAGACTAAAGGTTTGTCTCTTGCTTGGCAAGAACTGAGCTCTCCTACTTGATGCAGTTTATGACGTGACCATCGGCTATAAAAACCCGTTGTCCGTCTTTCTTAGACAACGTCTATGG : 639  
BnLPAT5-UK : ACGTCTGCTTCCCAAGACTAAAGGTTTGTCTCTTGCTTGGCAAGAACTGAGTTCTCCTACTTGATGCAGTTTATGACGTGACCATCGGTTATAAAAACCCGTTGTCCGTCTTTCTTAGACAACGTCTACGG : 639

AcGTg TGCTTCC A GAC AAAGGTTTcGTCTC TGCTTG AAGAAcTG gtTcCTCACTTGATGCAGTTTATGA GTGACCATCGGtTA AAAACCCGTTGTCCGTCTTTCTTAGACAA GTCTAtGG

BnLPAT5-A5 : TACTGAACCATCAGAAGTTCACATCCACATCCGTCGAATCAGCCAAAACCAAATCCCAAATGAAGAAAAGGAAATCAATGCTTGGTTAATGAACACATTCCAGATCAAAGACCAGCTGCTCAGTGAGTTC : 768  
BnLPAT5-C5 : TACTGAACCATCAGAAGTTCACATCCACATCCGTCGAATCAGCCAAAACCAAATCCCAAATGAAGAAAAGGAAATCAATGCTTGGTTAATGAACACATTCCAGATCAAAGACCAGCTGCTCAGTGAGTTC : 780  
BnLPAT5-C1 : TATCGAACCATCAGAAGTTCACATCCACATCCGTCGAATCAACCAAAGCAAATCCCAAATCAAGAAAAGGAGATCAATGATTGGTTAATGAACGCGTTTCAGCTCAAAGACCAGCTTCTCAGTGACTTC : 769  
BnLPAT5-UK : TATTGAACCATCAGAAGTTCACATCCGAATCCGTCGAATCAGCCAAAAGCAAATCCCAAATCAAGAAAAGGAGATCAATGATTGGTTAATGAACGCGTTCAGCTCAAAGACCAGCTTCTCAGTGACTTC : 769

TA tGAACCATCAGAAGTTCACATCCacATCCGTCGAATCa CAAA CcAAATCCCAAAT AAGAAAAGGA ATCaATG TTGGTTAATGAAC C TtCAG TCAAAGACCAGCT CTCAGTGA TTC

BnLPAT5-A5 : TACTCTCGTGGCCATTTCCCTAACGAAGGAACAGAAAAAGAGTTTCAACACACTGAAGCACCTCATAAACTGCTTGGCAGTATTGTTTACGATCATCTGCACGCATCTCACCTTCTTCTCGTCGATGA : 898  
BnLPAT5-C5 : TACTCTCGTGGCCATTTCCCTAACGAAGGAACAGAAAAAGAGTTTCAACACACTGAAGCACCTGATAAACTGCTTGGCAGTATTGTTTACGATCATCTGTACGCATCTCACCTTCTTCTCGTCGATGA : 910  
BnLPAT5-C1 : TACTCCAGTGGCCATTTCCCTAACGAAGGAACAGAAAAAGAGTTTCAACACACTGAAGCACCTCATAAACTGCTTGGCAGTATTCTTTCACGACCATCTGCACGTATCTCACCTTCTTTTCGTCATGA : 899  
BnLPAT5-UK : TACTCCAGTGGCCATTTCCCTAACGAAGGAACAGAAAAAGAGTTTCAACACACTGAAGCACCTCATAAACTGCTTGGCAGTATTGCTTTCACGGTTCATCTGCAGTATCTCACCTTCTTTTCGTCGATGG : 899

TACTC GTGGCCATTTCCCTAACGAAGGAACAGAAAAAGAGTTCA CACA T AAGCA CTcATAAACTGCTTGGC GTGATTgT TTCAGatCATCTGcaCG ATCTCACCTTCTT TCGTCgATGa

BnLPAT5-A5 : TCTGGTTCAAGATATATGTCTCTTTGGTCTGTGCCTACTTGACCTATGCTACTCATTTCATCTTTCGTCCTGCGCCCTTTGTTGAGACTGCAAAGAAAAGCTTT-----AGTAAAAAATGAACTTTTA : 1022  
BnLPAT5-C5 : TCTGGTTCAAGATCTATGTCTCTTTGGTCTGTGCCTACTTGACCTGTGCTACTCATTTCATCTTTCGTCCTGCGCCACTTGTGAGACTGCAAAGAAAAGCTTTCAAATTAGTAAAAAATGAACTTTTA : 1040  
BnLPAT5-C1 : TCTGGTTCAAGATCTCTGTCTCTTTGGTCTGTGCCTACTTGGCCTCCGCTACACATTTCAATCTTTCGTTCTGTTCCAATTGTTGAGACTGCAA-AAAAGCCTTCAAAT----- : 1007  
BnLPAT5-UK : TCTGGTTCAAGATCTATGTCTCTTTGGTCTGTGCCTACTTGGCCTCCGCTACACATTTCAATCTTTCGTTCTGTTCCAATTGTTGAGACTGCAA-AAAGCCTTCAAATGATTA----- : 1013

TCTGGTTCAAGATcTaTGTCTCTTTGGTCTGTGCCTACTTG CCT GCTAC CATTTCATCTTTCGTT CTG CCaCTTGTGAGACTGCAA AAAAGC TTcaaat a taa

BnLPAT5-A5 : A : 1023  
BnLPAT5-C5 : A : 1041  
BnLPAT5-C1 : - : -  
BnLPAT5-UK : - : -
